# Supplementary material
Source: PubMed Central journal article supplement (PMC7264433)
Supplement: mmc1.pdf [file mmc1.pdf]

**YMTHE, Volume 28**

**Supplemental Information**

**A Highly Efficacious PS Gene Editing  
System Corrects Metabolic and Neurological  
Complications of Mucopolysaccharidosis Type I**

**Li Ou, Michael J. Przybilla, Ozan Ahlat, Sarah Kim, Paula Overn, Jeanine Jarnes, M. Gerard O'Sullivan, and Chester B. Whitley**

## Supplemental Figures

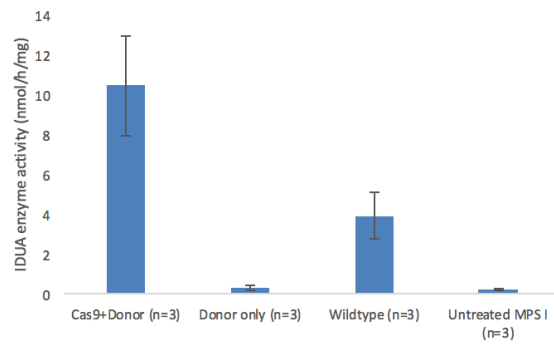

**Fig.S1. Hydrodynamic injection of plasmids encoding the PS system into adult MPS I mice.** The two plasmids were administered into adult MPS I mice through hydrodynamic injection. All mice were euthanized 2 days post injection. The enzyme activities in mice receiving Cas9 and donor plasmids were significantly higher than those in untreated or mice receiving the donor plasmid only.

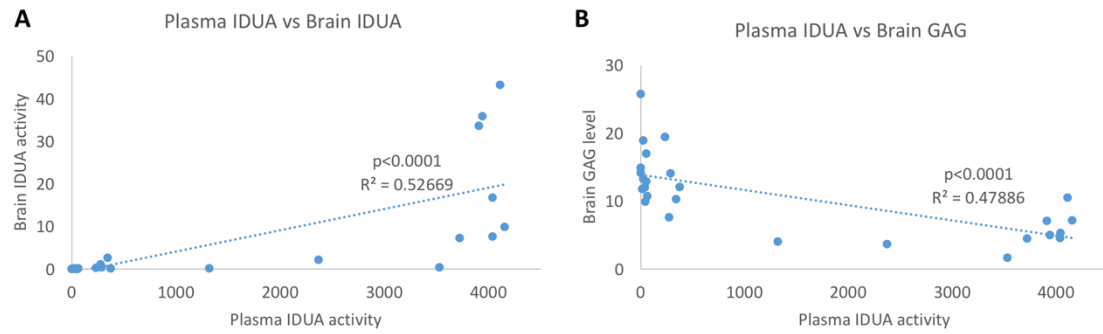

**Fig.S2. Correlation between plasma IDUA enzyme activity and IDUA enzyme activity and GAG level in the brain.** (A) Significant correlation between plasma IDUA enzyme activity at month 10 and brain IDUA enzyme activity in treated MPS I mice (all dose groups) was observed. (B) Significant correlation between plasma IDUA enzyme activity at month 10 and brain GAG level in treated MPS I mice (all dose groups) was observed. Pearson correlation analysis was performed.

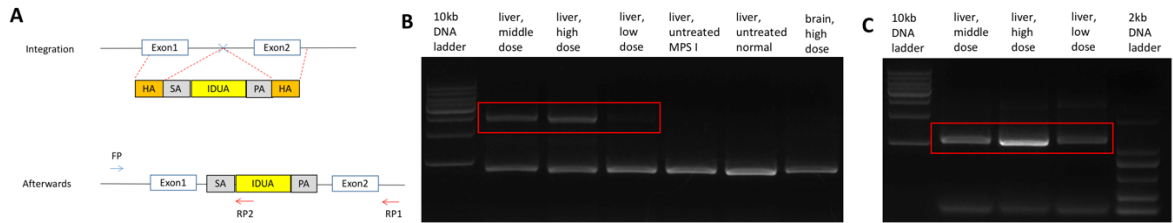

**Fig.S3. Nested PCR to confirm integration.** (A) Two sets of primers were designed to detect insertion of the donor sequence. FP: forward primer; RP1&2: reverse primer 1&2. In the first round of PCR, FP and RP1 generate an amplicon of 3,137 bp if there is an integration, and generate an amplicon of 924 bp in untreated controls. In the second round of PCR using the amplicon from the first round as the template, FP and RP2 generate an amplicon of 1,133 bp if there is an integration. (B) The gel image of the first round PCR was shown. Liver samples from all three treated groups had the band at the expected size of 3,137 bp, albeit the band from the low dose being faint. Liver samples from untreated MPS I and normal mice, as well as brain samples from the high dose group had no bands indicating insertion. (C) The gel image of the first round PCR was shown. Liver samples from all three treated groups had the band at the expected size of 1,133 bp. The amplicons are sequenced for further confirmation.

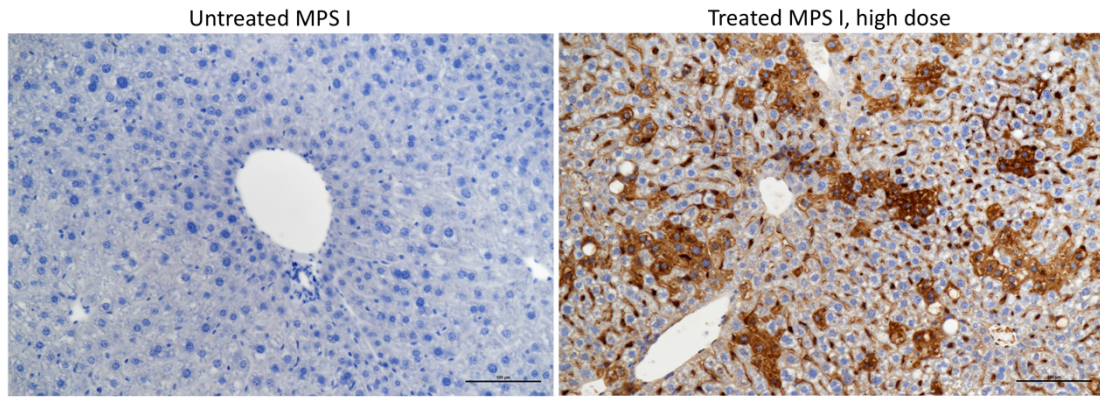

**Fig.S4. Immunohistochemistry for IDUA in the liver of MPS I mice.** IDUA-expressing cells are those with very strong signal (dark color). The number of IDUA-expressing cells constitute ~24.1% of all hepatocytes in MPS I mice neonatally treated with the high dose.

## Supplemental Tables

|                                      | Plasma IDUA enzyme activity at 1 month post-dosing (nmol/h/mL) |
|--------------------------------------|----------------------------------------------------------------|
| MPS I, donor only, high dose (n=6)   | 1.5±0.4                                                        |
| MPS I, donor only, middle dose (n=6) | 0.03±0.02                                                      |
| MPS I, donor only, low dose (n=6)    | 0                                                              |

**Table S1. Plasma IDUA enzyme activity in neonatal MPS I mice treated with the donor vector only.**

High dose,  $3 \times 10^{14}$  vg/kg; middle dose,  $3 \times 10^{13}$  vg/kg; low dose,  $3 \times 10^{12}$  vg/kg.

|                           | MPS I, untreated (n=9) | Normal (n=3) | MPS I, high dose (n=8) | MPS I, middle dose (n=8) | MPS I, low dose (n=14) |
|---------------------------|------------------------|--------------|------------------------|--------------------------|------------------------|
| Liver, foam cells         | 7/9*                   | 0/3          | 0/8                    | 0/8                      | 1/14                   |
| Purkinje cell vacuolation | 7/8*                   | 0/3          | 1/7                    | 8/8                      | 14/14                  |

**Table S2. Incidence of characteristic lesions associated with MPS I disease.** \*= number of evaluable tissues.

## Supplemental sequencing results

### 1. Sequencing the amplicon at the human albumin locus

gcagccaatgaaatacaaatgagctagtaataatctacaattattggttaaagaagatattagtgctaattccctccgttgcctagctttctctct  
gtcaacccccacacgcctttggcacaatgaagtggttaacacctttatctctcttttagctcggcttattccaggggtgtttctcgtcagatgcac  
gtaagaatccattttctattgttcaactttatctatctccagtaaaaaaagtttagtaaacctgcacatcttaagaatttttggcattttctaaaa  
tggcatagattttgtatttgaagctctacaaggttatcttataataaaatcaaacatcctaggttaaaaaaaaaaagggtcagaattgtttagtgactg  
aatctcttttggcactaaggaagtgcagaagtaacttagagtgactgaaacttcacagaatagggtgaagattgaattcataactatcccaaagacct  
atccattgcactatgcttttttaaaaccacaaaacctgtgctgtgatctcataaactaaagaattattctttacatttcagacactagtctccccctg  
tcgccctgccgaagccccccacctgtgtcaggtggacgccagagacctgtggccccctgagggcttctggcggagcaccggctttgcccc  
cctctgccccacagccagccgaccagctgctgtcctgggaccagcagctgaacctggcctacgtgggcgctgtccccaccgggcatca  
agcaggtgaggaccactggctgtggaactggtgaccacccggggcagcaccggcagggcctgagctacaacttcaccacctggcagggcta  
cctggacctgtcgggagaaccagctgctgcccggcttcgagctgatgggcagcggcagcggccacttcaccgacttcaggacaagcagcag  
gtgtcagtggaaggacctgt

### 2. Sequencing the amplicon at the mouse albumin locus

caacttttggcaaatggtatgattttgtaatgggtaggaaccaatgaaatgcaggttaagtatggttaatgatctacagtattggttaaagaagat  
atagagcagctttctgcacacagatcacctttctatcaacccactagcctctgcaaaatgaagtggtaacctttctctctctctctctctcc  
ggctctgcttttccaggggtgtttccggagaagcacgtaagagtttatgttttctctctgctgtattttctagtaatggaagcctggtattttaa  
atagttaaatttcttagtctgatttctagattattactgttgtgtgtattattgtcattttgcatctgagaaccttaggtggtatattatgatata  
tttggatctttgatgacaataactaaagaattattctttacatttcagacactagtctccccctgctgccccctgccgaagccccccacctggtcaggt  
ggacgccccagagccctgtggccccctgagggcttctggcggagcaccggctttgccccctctgccccacagccagccgaccagctacgtg  
ctgtctgggaccagcagctgaacctggcctacgtgggcgctgtccccaccgggcatcaagcaggtgaggaccactggctgtggaactgg  
tgaccacccggggcagcaccggcagggcctgagctacaacttcaccacctggacggctacctggacctgctgaggagaaccagctgctgcc  
cgcttcgagctgatgggcagcggcagccacttcaccgacttcaggacaagcagcaggtttcagtggaaggacctggttccagcctgg  
ctgcccgtatcggcagatagccctggcccactgagcaagtggaaacttcagacctggaacgagcccaccaccagacttcgacaactg  
gagcatgacctgagggccttctgaactactacgacgcctgcagcaggggctgagagccgccagccctgccctgagactggcgaccggc  
gacagcttcacacccccccagaagccccctgagctgggctgctgaggcactgccacgacggcacaatttctcaccggcagggcggcgt  
gaggctggactacatcagcctgcaccggaaggcgcagagaagcagcatcagcatcctggaacaggaaaaggctgctgctcagcagatccggca  
gtgttcccccaagttccgacacccccatctacaacgacgagccgacccccctggtggctggtctctgccccagcctggaggccgacgtgac  
ctacgcccatggtgtaaggtgatgcccagcaccagaacctgctgctggccaacaccacctccgcttcccttacgccctgcttccaacgac  
aacgcttctgagctaccacccccccctcggcagcgacctgaccggcgttccaggtgaacaacaccagacccccccacctgacgt  
gtgagggaagcccgtgctgaccgcatgggctgctggccctgctggacgaggaacagctgtggccgaggtgtccagccggcaccgtgct  
ggacagcaaccacacctgggctgctggctagcggccacagacctaggccctgccgatgccctggagagccgccgtgctgatctacgccagc  
gacgacaccagaccccccaaccggtcctggtggcctgacctgaggctgagaggctgctctccggccctggcctggtgtactgaccagat  
acctggacaacggcctgtgacccccgacggcagtgaggcggagctgggcagggccgtgttccccaccggcagcagttccggcgatgagag  
ccggcagggacccccgtggcctgccccctagacctgctgctgcccggcagggctgacctgagaccgccctgaggctccccagcctgctgct  
ggtgacgtgtgcccagggcccagaagccccagggcaggtgacctggctgctgcccctgctgacctgaccagggccagctggtgtgtgtg  
gagcagcagcagctgggcagcaagtgctgtggacctacgagatccagttcagccaggacggcaaggcctacacccccgtgagccggaagcc  
cagcacttcaactgttctgtttcagccccacacaggcggctgagcggcagctacagagtggggccctggactactgggctcggcctggcc  
cctcagcagccccgtgccctacctggaagtggcctgcccagggcctcccagcccggcaaccctgaggatcctctagataactgatcataat  
cagccataaccattttagaggtttactgtcttaaaaaacctccacacctccccctgaacctgaacataaaatgaatgcaattgtgttactgt  
ttattgcagcttataatggttacaaataagcaatagcatcacaatffcacaaataaagcatttttactgcatctagtgtgtgtgtccaactcatca  
atgtatctatttaaatggcgccatgggggatttgaagccttagctttaaattcttttaataaaaaaaatgctaggcagaatgactcaattacgt  
tggatagctgaatttattacggctcatagggcctgctgctgacctgctatacctaaaaatgaggtgtgtgttactaattttataatgaggttcca



ttatattaccttattcttattaccattgtcttagtagatattacaacatgacagaaacactaaatcttgagttgaatgcacagataaacacttaacg  
ggtttaaaaataataatgttggtagaaaaataactttgagtgtagcagagaggaaccattgccacctcagatttctgtaacgatcgggaactggc  
atcttcaggagtagcttaggtcagtgagagaagaacaaaaagcagcatattacagtagttgtctcatcaatcttfaatatgttgtgggtttctctc  
ctgtttccacagacaagagtgagatcgccatcggfataatgattgggagaacaacattt
